# Supplementary material for: PRG3 induces Ras-dependent oncogenic cooperation in gliomas
Source: PubMed Central journal article supplement (PMC5042008; doi:10.18632/oncotarget.8592), 2016-04-05
Supplement: oncotarget-07-26692-s001.pdf [file oncotarget-07-26692-s001.pdf]

## PRG3 induces Ras-dependent oncogenic cooperation in gliomas

### Supplementary Materials

|        |            |             |             |            |             |            |
|--------|------------|-------------|-------------|------------|-------------|------------|
|        | 10         | 20          | 30          | 40         | 50          | 60         |
| hPRG-3 | MAVGNNTQRS | YSIIPCFFIV  | ELVIMAGTVL  | LAYYFECTDT | FQVHIQGFFC  | QDGDLMKPYP |
| mPRG-3 | MAVENNTQRS | YSIIPCFFIV  | ELVIMAGTVL  | LAYYFECTDT | FQVHIQGFFC  | QDGDLMKPYP |
| rPRG-3 | MAVENNTQRS | YSIIPCFFIV  | ELVIMAGTVL  | LAYYFECTDT | FQVHIQGFFC  | QDGDLMKPYP |
|        | TM2 70     | 80          | 90          | 100        | 110         | 120        |
| hPRG-3 | GTEEESFITP | LVLYCVLAAT  | PTAIFIGEI   | SMYFIKSTRE | SLIAQEKTIIL | TGECCYLNPL |
| mPRG-3 | GTEEESFISP | LVLYCVLAAT  | PTAIFIGEI   | SMYFIKSTRE | SLIAEEKMIL  | TGDCCYLSPL |
| rPRG-3 | GTEEESFISP | LVLYCVLAAT  | PTAIFIGEI   | SMYFIKSTRE | SLIAEEKMIL  | TGDCCYLSPL |
|        | TM3 130    | 140         | 150         | 160        | 170         | 180        |
| hPRG-3 | LRRIRFTGV  | FAFGLFATDI  | FVNAGQVVTG  | HLTPYFLTVC | KPNYTSADCQ  | AHQFINNGN  |
| mPRG-3 | LRRIRFIGV  | FAFGLFATDI  | FVNAGQVVTG  | HLTPYFLTVC | QPNYTSTDCR  | AHQFINNGN  |
| rPRG-3 | LRRIVRFIVG | FAFGLFATDI  | FVNAGQVVTG  | HLTPYFLTVC | QPNYTSTDCR  | AHQFINNGN  |
|        | 190        | 200         | TM4 210     | 220        | 230         | TM5 240    |
| hPRG-3 | ICTGDLEVIE | KARRSFPSKH  | AALSIYSALY  | ATMYITSTIK | TKSSRLAKPV  | LCLGTLCTAF |
| mPRG-3 | ICTGDLEVIE | KARRSFPSKH  | AALSIYSALY  | ATMYITSTIK | TKSSRLAKPV  | LCLGTLCTAF |
| rPRG-3 | ICTGDLEVIE | KARRSFPSKH  | AALSIYSALY  | ATMYITSTIK | TKSSRLAKPV  | LCLGDLCTAF |
|        | 250        | TM6 260     | 270         | 280        | 290         | 300        |
| hPRG-3 | LTGLNRVSEY | RNHCSVDVIAG | FILGTAVALF  | LGMCVVHNEK | GTQGSPSKPK  | PEDPRGVPLM |
| mPRG-3 | LTGLNRVSEY | RNHCSVDVIAG | FILGTAVALF  | LGMCVVHNER | GTQGSPSKPK  | PEDPRGVPLM |
| rPRG-3 | LTGLNRVSEY | RNHCSVDVIAG | FILGTAVALF  | LGMCVVHNEK | GTQGSASKPK  | PEDPRGVPLM |
|        | 310        | 320         | 330         |            |             |            |
| hPRG-3 | AFPRIESPLE | TLSAQNHSAS  | MTEVT.....  |            |             |            |
| mPRG-3 | AFPRIESPLE | TLSAQNHSAS  | MTEVT*..... |            |             |            |
| rPRG-3 | AFPRIESPLE | TLSAQNHSAS  | MTEVT.....  |            |             |            |

**Supplementary Figure S1: PRG3 amino acid sequence alignment of human, rat and mouse species.** Amino acid sequence of human PRG3 (GenBank Accession no. AY337718) aligned to mouse PRG3 (GenBank Accession no. AY345342) and rat PRG3 (GenBank Accession no. AY299399). Putative transmembrane domains TM1 - TM6 are boxed (black lines).

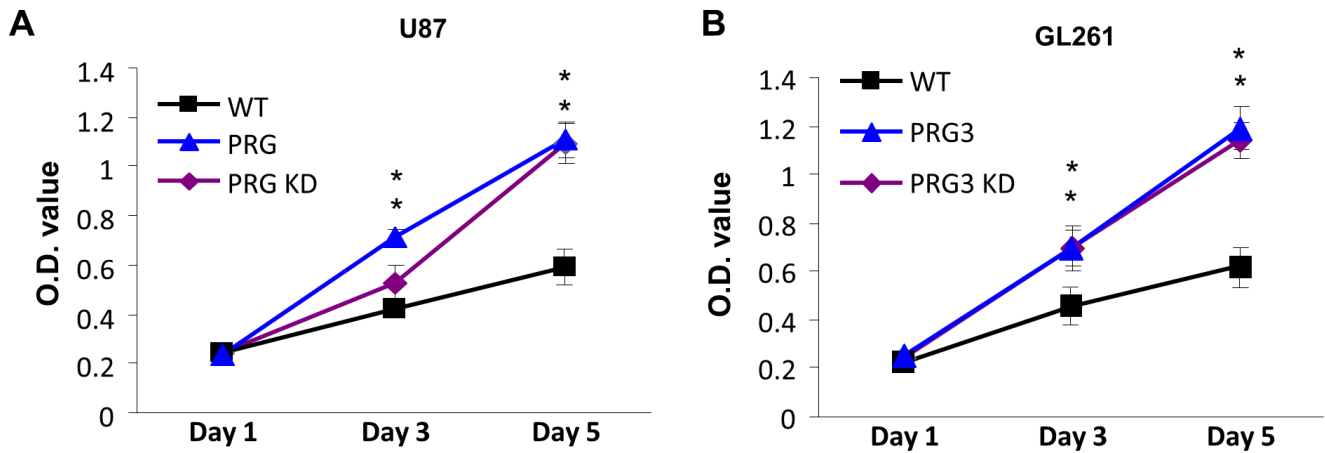

**Supplementary Figure S2: PRG3 expression enhances human tumor proliferation.** (A) PRG3 boosts growth in human glioma cells. Quantitative growth analysis of human glioma cells (U87) over time. Note that PRG3 overexpressing cells grow significantly faster than wild-type (WT) gliomas. Statistical significance was calculated with Student's *t*-test (mean  $\pm$  SD,  $n > 12$  per group;  $*P < 0.05$ ). (B) PRG3 boosts growth in murine glioma cells. Quantitative analysis of cell growth in murine glioma cells (GL-261) over time. Note that PRG3 overexpressing cells grow significantly faster than RFP control transfected cells. Statistical significance was calculated with Student's *t*-test (mean  $\pm$  SD,  $n = 12$  per group;  $*P < 0.05$ ). Abbreviation: OD, optical density.

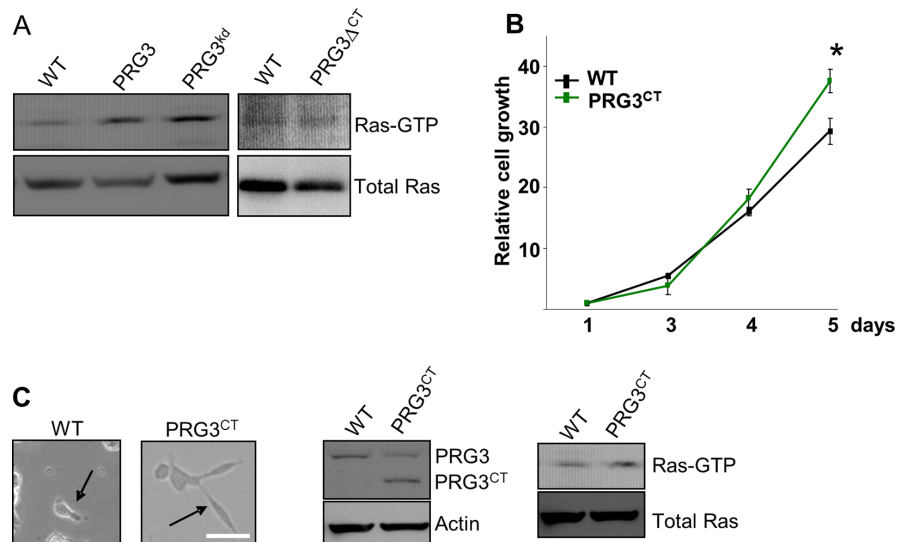

**Supplementary Figure S3: (A) Left, Perturbed PRG3 expression leads to elevated Ras activation.** Upper blot gives levels of activated GTP-Ras in wild-type (WT), PRG3 overexpressing (PRG3) and PRG3-knockdown (PRG3<sup>kd</sup>) gliomas. Total Ras served as controls for equal loading (bottom panel). *Right*, C-terminal tail deleted PRG3 construct does not affect Ras signaling. (B) PRG3 promotes cell growth through its C-terminal domain. Quantitative analysis of cell growth over time of parental (WT) and PRG3-C-terminal domain expressing (PRG3<sup>CT</sup>) glioma cells. Statistical significance was calculated with Student's *t*-test (mean  $\pm$  SD,  $n = 4$  per group;  $*P < 0.005$ ). (C) PRG3<sup>CT</sup> expression in gliomas alters cellular morphology and activates Ras. *Left*, representative images showed PRG3-C-terminal domain expressing (PRG3<sup>CT</sup>) glioma cells exert an elongated cell shapes comparable to PRG3 full length expressing gliomas. Middle, Upper blot shows PRG3<sup>CT</sup> expression levels in wild-type (WT) and PRG3<sup>CT</sup> glioma cells. Actin served as a control for equal loading (bottom panel). *Right*, Upper panel shows activated Ras-GTP in wild-type (WT) and PRG3<sup>CT</sup> glioma cells. Total Ras served as a control for equal loading (bottom panel). Scale bar represents 50  $\mu$ m.

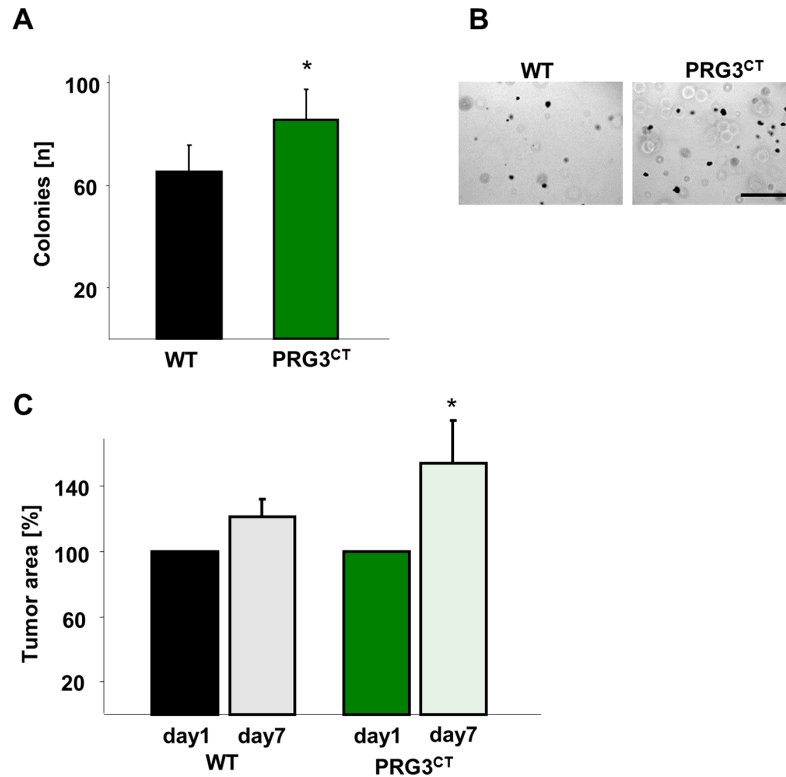

**Supplementary Figure S4: The C-terminal domain of PRG3 promotes oncogenesis and glioma growth.** Oncogenic amplification of glioma cells after expression of the C-terminal domain of PRG3. **(A)** Quantitative analysis of colony formation in parental wild-type glioma cells (WT) and PRG3 C-terminal domain expressing gliomas (PRG3<sup>CT</sup>). Quantification is given from three independent experiments. Values are given as mean  $\pm$  SD, \* $P < 0.001$  (Student's unpaired  $t$ -test). **(B)** Representative images of colonies formed in soft agar from wild-type glioma cells (WT) and PRG3 C-terminus expressing gliomas (PRG3<sup>CT</sup>). Scale bar, 500  $\mu$ m. **(C)** Expression of PRG3 C-terminal domain in gliomas (PRG3<sup>CT</sup>) fosters tumor expansion into brain parenchyma. GFP+ glioma cells (WT) and PRG3 C-terminal domain expressing gliomas (PRG3<sup>CT</sup>) were implanted in brain slices and tumor expansion was evaluated after various days. Quantitative analysis of tumor expansion (bright colored columns represent tumor expansion at day 1; faintly colored columns represent tumor expansion at day 7). Statistical significance was calculated with Student's unpaired  $t$ -test (mean  $\pm$  SD,  $n = 6$  per group; \* $P < 0.005$ ).
